# Supplementary material for: Factors associated with undertriage and overtriage in telephone triage in Danish out-of-hours primary care: a natural quasi-experimental cross-sectional study of randomly selected and high-risk calls
Source: HighWire-hosted journal article supplement (doi:10.1136/bmjopen-2022-064999), 2023-03-01
Supplement: bmjopen-2022-064999supp001_data_supplement.pdf [file bmjopen-2022-064999supp001_data_supplement.pdf]

**Appendix 1.** Exclusion criteria

| Type of call                              | Definition/clarification                                                                                                                                                                                                                               |
|-------------------------------------------|--------------------------------------------------------------------------------------------------------------------------------------------------------------------------------------------------------------------------------------------------------|
| Frequent callers                          | Patients with $\geq 7$ calls during the two-week inclusion period (the patient's medical record from the OOH service that could include important information on these patients was only available to the triage professional and not to the assessor) |
| Calls by mistake                          | Calls with no caller answering the triage professional                                                                                                                                                                                                 |
| Daytime calls                             | Calls performed during daytime (the telephone triage service at MH-1813 was available during daytime)                                                                                                                                                  |
| Calls by other health professionals       | The caller was another healthcare professional, e.g. from a nursing home                                                                                                                                                                               |
| Administrative calls                      | The reason for calling was administrative, e.g. calling to get the number for the acute dentist                                                                                                                                                        |
| Calls regarding simple drug prescriptions | The patient called for renewal of a prescription that required little information sharing                                                                                                                                                              |
| Preterm termination                       | Calls that were ended too early, e.g. calls made by error, no sound on call, or sound interrupted in the middle of call                                                                                                                                |
| Calls from other localisation             | Calls from a caller who was not in the same location as the patient, e.g. parent on the way to pick up a sick child from day care                                                                                                                      |
| Calls with poor sound quality             | Calls with poor sound quality making assessment difficult                                                                                                                                                                                              |
| Language issues                           | Calls in which language issues challenged the triage, i.e. caller did not speak Danish or English                                                                                                                                                      |

Not able to identify call | Calls where an exact linkage to the corresponding audio recording could not be established
